# Supplementary material
Source: PubMed Central journal article supplement (PMC9617358)
Supplement: 13012_2022_1245_MOESM2_ESM.pdf [file 13012_2022_1245_MOESM2_ESM.pdf]

# Consolidated Framework for Implementation Research User Survey

Research Information Sheet

Please complete the survey below.

Thank you!

---

Please enter your name: \_\_\_\_\_

---

Please enter your email address: \_\_\_\_\_

**The first part of the survey is about how you have used the CFIR in your work:**

How many projects (e.g., research studies, quality improvement projects) have you done that used the CFIR?

---

Please list publication titles:

---

Which settings have you used the CFIR in? Please check all that apply:

- Healthcare
- Public Health
- Education
- Agriculture
- Other

Please describe:

---

How have you used the CFIR? Please check all that apply:

- To guide data collection (e.g., developing an interview guide or survey items)
- To guide data analysis (e.g., coding data)
- To guide interpretation (e.g., translating findings to align with CFIR constructs)
- To design an implementation strategy
- Other

Please describe:

---

Have you used and/or developed quantitative measures based on the CFIR?

- Yes
- No

Please list publication titles:

---

Please list the name(s) of quantitative measures used:

---

Have you used the CFIR in conjunction with another theory, model, or framework?

- Yes
- No

What frameworks have you used with the CFIR?

---

Why did you use other frameworks with the CFIR?

---

**The second part of the survey is about your overall assessment of the CFIR based on your own experiences with its use:**

|                                                                                                                                                                           | Yes                   | Partially             | No                    | Uncertain             |
|---------------------------------------------------------------------------------------------------------------------------------------------------------------------------|-----------------------|-----------------------|-----------------------|-----------------------|
| Is the CFIR applicable across different settings (e.g., healthcare and non healthcare settings)?                                                                          | <input type="radio"/> | <input type="radio"/> | <input type="radio"/> | <input type="radio"/> |
| Is the CFIR applicable for different types of innovations (e.g., clinical interventions, process changes, new guidelines)?                                                | <input type="radio"/> | <input type="radio"/> | <input type="radio"/> | <input type="radio"/> |
| Is the CFIR more complicated than necessary?                                                                                                                              | <input type="radio"/> | <input type="radio"/> | <input type="radio"/> | <input type="radio"/> |
| Is the CFIR organized in a logical way that is easy to understand?                                                                                                        | <input type="radio"/> | <input type="radio"/> | <input type="radio"/> | <input type="radio"/> |
| Is it easy for implementation researchers to use the CFIR?                                                                                                                | <input type="radio"/> | <input type="radio"/> | <input type="radio"/> | <input type="radio"/> |
| Is it easy for people who are not implementation researchers to use the CFIR?                                                                                             | <input type="radio"/> | <input type="radio"/> | <input type="radio"/> | <input type="radio"/> |
| Is the CFIR suitable for helping people to identify and prioritize determinants of change in practice that should be considered when designing implementation strategies? | <input type="radio"/> | <input type="radio"/> | <input type="radio"/> | <input type="radio"/> |
| Is the CFIR likely to be useful to people designing implementation strategies?                                                                                            | <input type="radio"/> | <input type="radio"/> | <input type="radio"/> | <input type="radio"/> |
| Is the CFIR likely to be useful for reporting determinants of practice in research?                                                                                       | <input type="radio"/> | <input type="radio"/> | <input type="radio"/> | <input type="radio"/> |
| Does the CFIR help to advance or build theory?                                                                                                                            | <input type="radio"/> | <input type="radio"/> | <input type="radio"/> | <input type="radio"/> |
| Does the CFIR help to compare findings across studies?                                                                                                                    | <input type="radio"/> | <input type="radio"/> | <input type="radio"/> | <input type="radio"/> |

Please share any comments:

---

**The third part of the survey is about your recommendations for existing domains and/or constructs in the CFIR.**

Are the constructs and domains (groups of constructs) labeled and explained in a way that is easy to understand?  Yes  No  Uncertain

Please describe any recommendations you have to revise existing domain and/or constructs names and/or definitions below.

To review the CFIR Domains and Constructs visit: <https://cfirguide.org/constructs/> or download the attachment below.

[Attachment: "cfir\_guide.pdf"]

I. INTERVENTION CHARACTERISTICS

A. Intervention Source

\_\_\_\_\_

B. Evidence Strength and Quality

\_\_\_\_\_

C. Relative Advantage

\_\_\_\_\_

D. Adaptability

\_\_\_\_\_

E. Trialability

\_\_\_\_\_

F. Complexity

\_\_\_\_\_

G. Design Quality and Packaging

\_\_\_\_\_

H. Cost

\_\_\_\_\_

II. OUTER SETTING

---

A. Patient Needs and Resources

---

---

B. Cosmopolitanism

---

---

C. Peer Pressure

---

---

D. External Policies and Incentives

---

---

III. INNER SETTING

---

A. Structural Characteristics

---

---

B. Networks and Communications

---

---

C. Culture

---

---

D. Implementation Climate

---

---

1. Tension for Change

---

---

2. Compatibility

---

---

3. Relative Priority

---

---

4. Organizational Incentives and Rewards

---

---

5. Goals and Feedback

---

---

6. Learning Climate

---

---

E. Readiness for Implementation

---

---

1. Leadership Engagement

---

---

2. Available Resources

---

---

3. Access to Knowledge and Information

---

---

IV. CHARACTERISTICS OF INDIVIDUALS

---

A. Knowledge and Beliefs about the Intervention

---

---

B. Self-Efficacy

---

---

C. Individual Stage of Change

---

---

D. Individual Identification with Organization

---

---

E. Other Personal Attributes

---

---

V. PROCESS

---

A. Planning

---

---

B. Engaging

---

---

1. Opinion Leaders

---

---

2. Formally Appointed Internal Implementation Leaders

---

---

3. Champions

---

---

4. External Change Agents

---

---

C. Executing

---

---

D. Reflecting and Evaluating

---

**The final part of the survey is about your recommendations to add or remove any domains and/or constructs in the CFIR.**

Are potentially important domains and/or constructs missing from the CFIR?

- Yes
- No
- Uncertain

Please describe any recommendations you have to ADD any domains and/or constructs to the CFIR:

\_\_\_\_\_

Are domains and/or constructs included in the CFIR that should not be?

- Yes
- No
- Uncertain

Please describe any recommendations you have to REMOVE any domains and/or constructs from the CFIR:

\_\_\_\_\_

Do you have any other recommendations for updating the CFIR or other insights you would like to share?

\_\_\_\_\_
